# Supplementary material for: Anthropogenic and Climate-Exacerbated Landscape Disturbances Converge to Alter Phosphorus Bioavailability in an Oligotrophic River
Source: MDPI journal article supplement (doi:10.3390/w13223151), 2021-11-09
Supplement: s1 [file s1]

## Supplementary Material

**Table S1.** *p*-values for post-hoc pairwise Mann-Whitney rank sum tests between sites for riverbed fine sediment  $\text{Al}_2\text{O}_3$  proportions.

| SITE | S1    | S2    | S3    | S4    | S5    |
|------|-------|-------|-------|-------|-------|
| S2   | 0.003 |       |       |       |       |
| S3   | 0.001 | 0.609 |       |       |       |
| S4   | 0.001 | 0.003 | 0.001 |       |       |
| S5   | 0.001 | 0.003 | 0.001 | 0.278 |       |
| S6   | 0.001 | 0.003 | 0.001 | 0.190 | 0.005 |

**Table S2.** *p*-values for post-hoc pairwise Mann-Whitney rank sum tests between sites for riverbed fine sediment  $\text{Fe}_2\text{O}_3$  proportions.

| SITE | S1    | S2    | S3    | S4    | S5    |
|------|-------|-------|-------|-------|-------|
| S2   | 0.002 |       |       |       |       |
| S3   | 0.001 | 0.898 |       |       |       |
| S4   | 0.001 | 0.001 | 0.001 |       |       |
| S5   | 0.001 | 0.001 | 0.001 | 0.297 |       |
| S6   | 0.001 | 0.001 | 0.001 | 0.001 | 0.001 |

**Table S3.** *p*-values for post-hoc pairwise Mann-Whitney rank sum tests between sites for riverbed fine sediment MnO proportions.

| SITE | S1    | S2    | S3    | S4    | S5     |
|------|-------|-------|-------|-------|--------|
| S2   | 0.352 |       |       |       |        |
| S3   | 0.748 | 0.059 |       |       |        |
| S4   | 0.006 | 0.006 | 0.006 |       |        |
| S5   | 0.017 | 0.009 | 0.014 | 0.009 |        |
| S6   | 0.009 | 0.006 | 0.006 | 0.016 | 0.3959 |

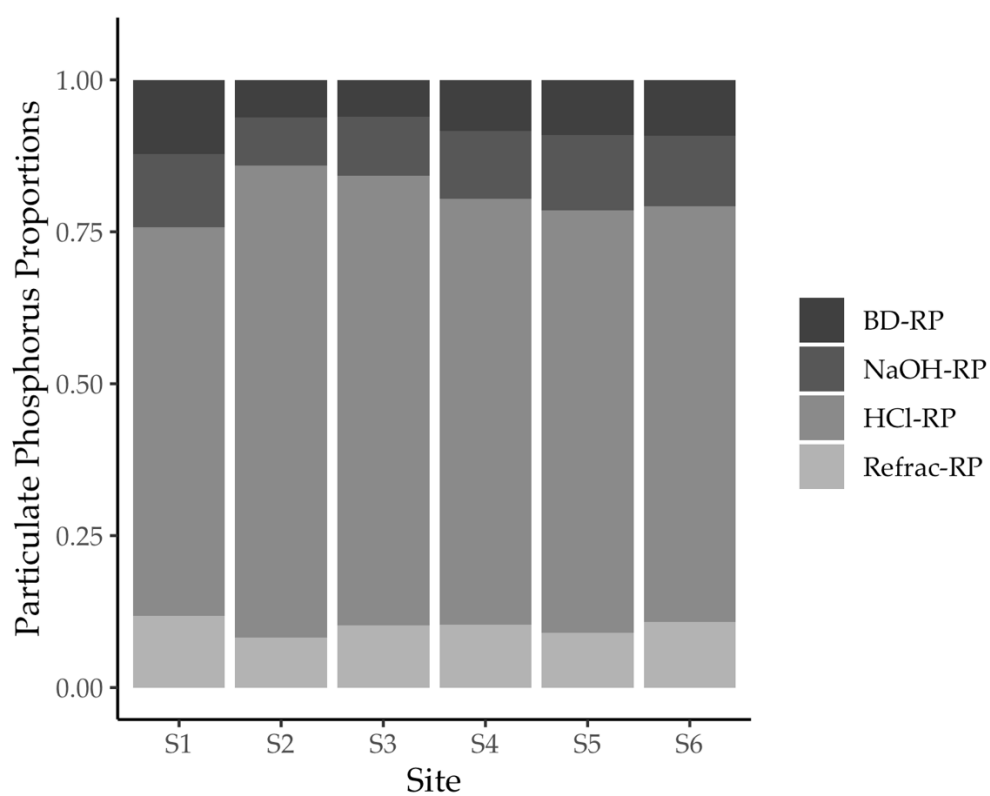

Figure S1. Average proportion of particulate phosphorus (PP) forms in fine sediments stored in the gravel bed of the Crowsnest River in 2016 and 2017 (n=4 per site).
